# Supplementary material
Source: PubMed Central journal article supplement (PMC4928680)
Supplement: NIHMS795999-supplement-01.pdf [file NIHMS795999-supplement-01.pdf]

**Supplementary Table 1.** Association Between Oral Contraceptive Use and Risk of Surgery According to Parity

|                                      | Cumulative DDD use |                  |                  | <i>P</i> <sub>trend</sub> | <i>P</i> <sub>interaction</sub> |
|--------------------------------------|--------------------|------------------|------------------|---------------------------|---------------------------------|
|                                      | 0                  | ≤300             | >300             |                           |                                 |
| Nulliparous                          |                    |                  |                  |                           | .86                             |
| Cases/person-months                  | 253/138,843        | 9/5169           | 34/12,329        |                           |                                 |
| Age-adjusted HR (95% CI)             | 1.00               | 1.06 (0.75–1.58) | 1.41 (1.05–2.19) |                           |                                 |
| MV-adjusted HR (95% CI) <sup>a</sup> | 1.00               | 1.05 (0.74–1.59) | 1.50 (1.11–2.31) | .018                      |                                 |
| Parous                               |                    |                  |                  |                           |                                 |
| Cases/person-months                  | 167/91,648         | 6/3439           | 20/7253          |                           |                                 |
| Age-adjusted HR (95% CI)             | 1.00               | 0.97 (0.48–1.72) | 1.34 (0.95–2.07) |                           |                                 |
| MV-adjusted HR (95% CI) <sup>a</sup> | 1.00               | 0.95 (0.43–1.70) | 1.38 (0.99–2.16) | .056                      |                                 |

<sup>a</sup>Adjusted for age (years), number of encounters, duration of disease (years), and county.
